# Supplementary material for: Searching for Novel Sources of Hydrogen Sulfide Donors: Chemical Profiling of Polycarpa aurata Extract and Evaluation of the Anti-Inflammatory Effects
Source: MDPI journal article supplement (doi:10.3390/md21120641), 2023-12-15
Supplement: s1 [file s1]

# Searching for Novel Sources of Hydrogen Sulfide Donors: Chemical Profiling of *Polycarpa aurata* Extract and Evaluation of the Anti-inflammatory Effects

Marcello Casertano<sup>1,†</sup>, Erika Esposito<sup>1,†</sup>, Ivana Bello<sup>1</sup>, Chiara Indolfi<sup>2</sup>, Masteria Yunovilsa Putra<sup>3</sup>, Lorenzo Di Cesare Mannelli<sup>4</sup>, Carla Ghelardini<sup>4</sup>, Marialuisa Menna<sup>1</sup>, Raffaella Sorrentino<sup>1</sup>, Giuseppe Cirino<sup>1</sup>, Roberta d'Emmanuele di Villa Bianca<sup>1\*</sup>, Concetta Imperatore<sup>1\*</sup>, Elisabetta Panza<sup>1,†</sup>, Emma Mitidieri<sup>1,†</sup>

<sup>1</sup> Department of Pharmacy, School of Medicine and Surgery, University of Naples Federico II, Via D. Montesano 49, 80131 Naples, Italy; [marcello.casertano@unina.it](mailto:marcello.casertano@unina.it) (M.C.); [erika8esposito@gmail.com](mailto:erika8esposito@gmail.com) (E.E.); [iv.bello.ib@gmail.com](mailto:iv.bello.ib@gmail.com) (I.B.); [mlmenna@unina.it](mailto:mlmenna@unina.it) (M.M.); [rafsorre@unina.it](mailto:rafsorre@unina.it) (R.S.); [cirino@unina.it](mailto:cirino@unina.it) (G.C.); [e.panza@unina.it](mailto:e.panza@unina.it) (E.P.); [emma.mitidieri@unina.it](mailto:emma.mitidieri@unina.it) (E.M.)

<sup>2</sup> Department of Molecular Medicine and Medical Biotechnology, School of Medicine and Surgery, University of Naples Federico II, Naples, Italy; [chiara.indolfi@unina.it](mailto:chiara.indolfi@unina.it) (C.I.)

<sup>3</sup> Research Center for Vaccine and Drugs, Research Organisation for Healths, National Research and Innovation Agency (BRIN), Jalan Raya Jakarta-Bogor KM. 46, Cibinong 16911, Indonesia; [masteria.yunovilsa.putra@brin.go.id](mailto:masteria.yunovilsa.putra@brin.go.id) (M.Y.P.)

<sup>4</sup> Department of Neuroscience, Psychology, Drug Research and Child Health-NEUROFARBA-Pharmacology and Toxicology Section, University of Florence; [lorenzo.mannelli@unifi.it](mailto:lorenzo.mannelli@unifi.it) (L.D.C.M.); [carla.ghelardini@unifi.it](mailto:carla.ghelardini@unifi.it) (C.G.)

# Table of content

|                                                                                                                                                                |    |
|----------------------------------------------------------------------------------------------------------------------------------------------------------------|----|
| <b>Figure S1.</b> LC-HRMS of <b>1</b> : (A) Extracted ion Chromatogram (XIC) at the selected ion, (B) relevant HRMS and (C) relevant HRMS <sup>2</sup> spectra | 2  |
| <b>Figure S2.</b> LC-HRMS of <b>2</b> : (A) Extracted ion Chromatogram (XIC) at the selected ion, (B) relevant HRMS and (C) relevant HRMS <sup>2</sup> spectra | 4  |
| <b>Figure S3.</b> LC-HRMS of <b>3</b> : (A) Extracted ion Chromatogram (XIC) at the selected ion, (B) relevant HRMS and (C) relevant HRMS <sup>2</sup> spectra | 5  |
| <b>Figure S4.</b> LC-HRMS of <b>4</b> : (A) Extracted ion Chromatogram (XIC) at the selected ion, (B) relevant HRMS and (C) relevant HRMS <sup>2</sup> spectra | 7  |
| <b>Figure S5.</b> LC-HRMS of <b>5</b> : (A) Extracted ion Chromatogram (XIC) at the selected ion, (B) relevant HRMS and (C) relevant HRMS <sup>2</sup> spectra | 8  |
| <b>Figure S6.</b> LC-HRMS of <b>6</b> : (A) Extracted ion Chromatogram (XIC) at the selected ion, (B) relevant HRMS and (C) relevant HRMS <sup>2</sup> spectra | 11 |
| <b>Figure S7.</b> LC-HRMS of <b>7</b> : (A) Extracted ion Chromatogram (XIC) at the selected ion, (B) relevant HRMS and (C) relevant HRMS <sup>2</sup> spectra | 13 |
| <b>Figure S8.</b> LC-HRMS of <b>8</b> : (A) Extracted ion Chromatogram (XIC) at the selected ion, (B) relevant HRMS and (C) relevant HRMS <sup>2</sup> spectra | 14 |
| <b>Figure S9.</b> <sup>1</sup> H NMR spectrum (700 MHz) in CDCl <sub>3</sub> of PAB2                                                                           | 16 |
| <b>Figure S10.</b> COSY spectrum in CDCl <sub>3</sub> of PAB2                                                                                                  | 16 |
| <b>Figure S11.</b> Downfield region enlargement of COSY spectrum in CDCl <sub>3</sub> of PAB2                                                                  | 17 |
| <b>Figure S12.</b> HSQC spectrum in CDCl <sub>3</sub> of PAB2;                                                                                                 | 17 |
| <b>Figure S13.</b> HMBC spectrum in CDCl <sub>3</sub> of PAB2                                                                                                  | 18 |
| <b>Figure S14.</b> Downfield region enlargement of HMBC spectrum in CDCl <sub>3</sub> of PAB2                                                                  | 18 |

18052023PABMEOH10 #1627 RT: 15.53 AV: 1 NL: 2,98E7  
F: FTMS + c ESI Full ms [150,00-1100,00]

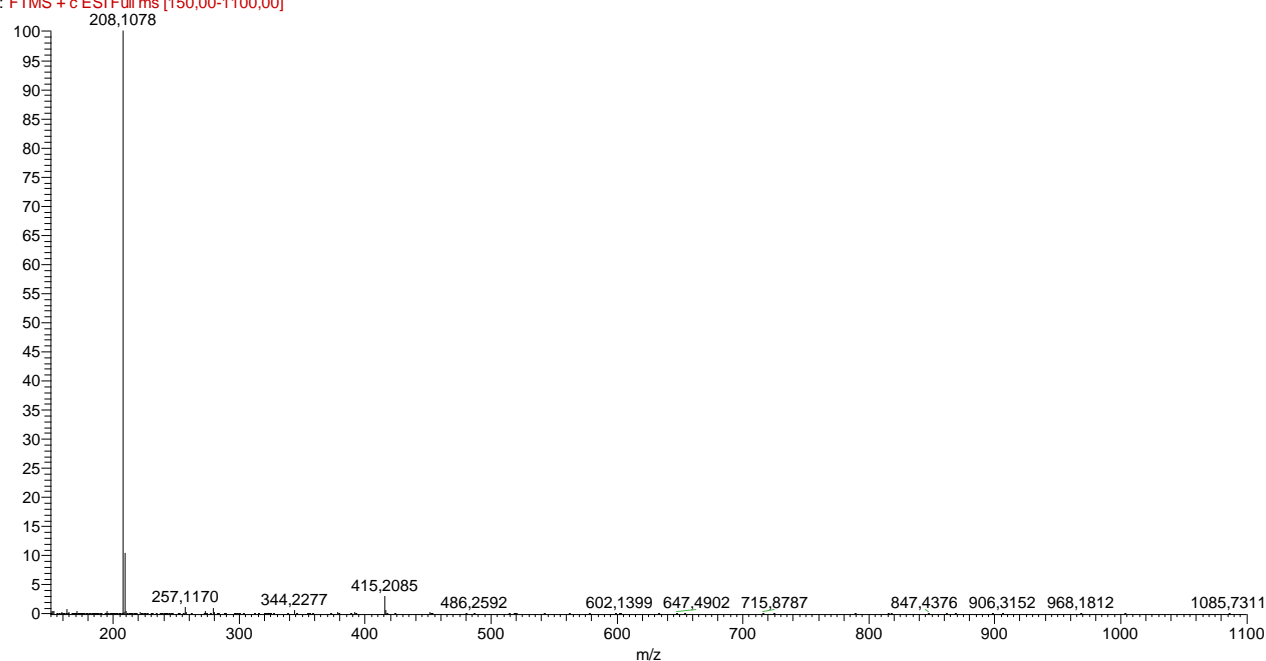

RT: 0,00 - 45,14

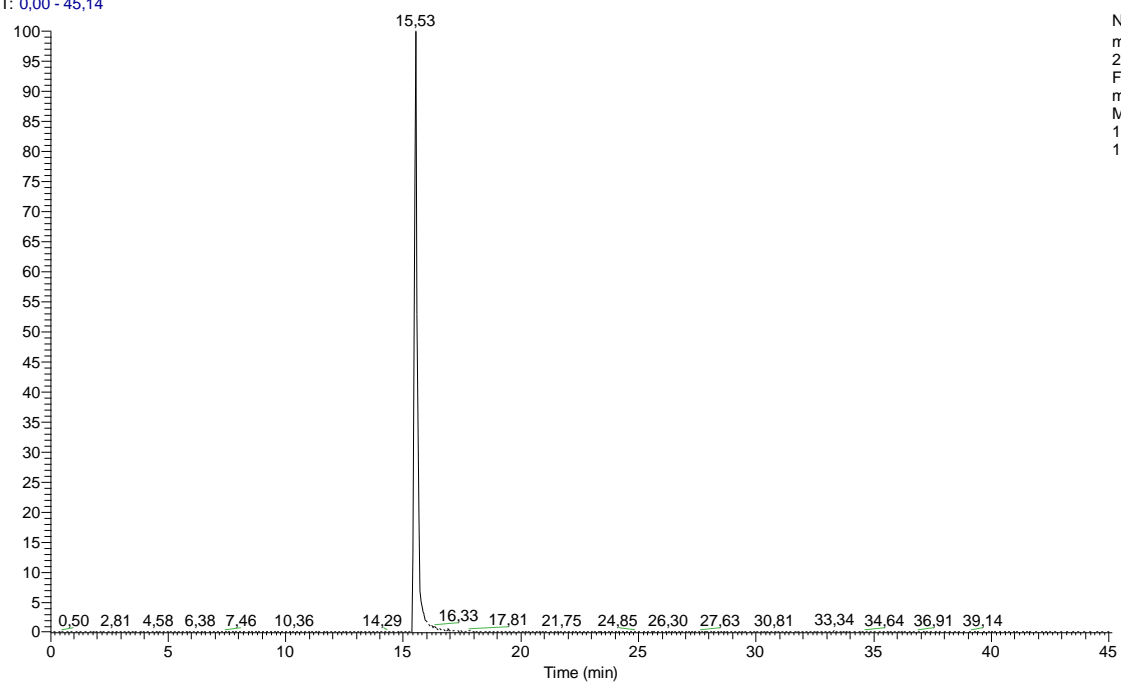

NL: 2,98E7  
m/z=  
208,1068-208,1088  
F: FTMS + c ESI Full  
ms [150,00-1100,00]  
MS  
18052023PABMEOH  
10

18052023PABMEOH10 #1627 RT: 15,53 AV: 1 NL: 2,98E7

F: FTMS + c ESI Full ms [150,00-1100,00]

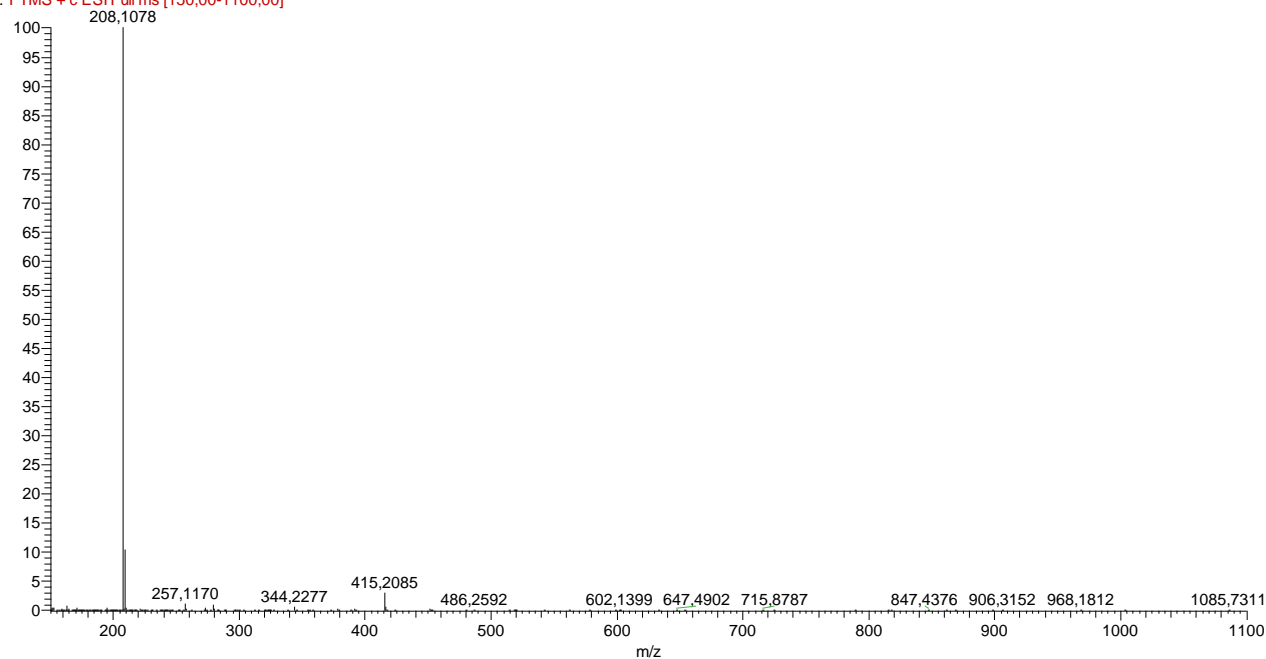

18052023PABMEOH10 #1646 RT: 15,72 AV: 1 NL: 7,74E5

T: FTMS + c ESI d Full ms2 208,11@cid25,00 [50,00-220,

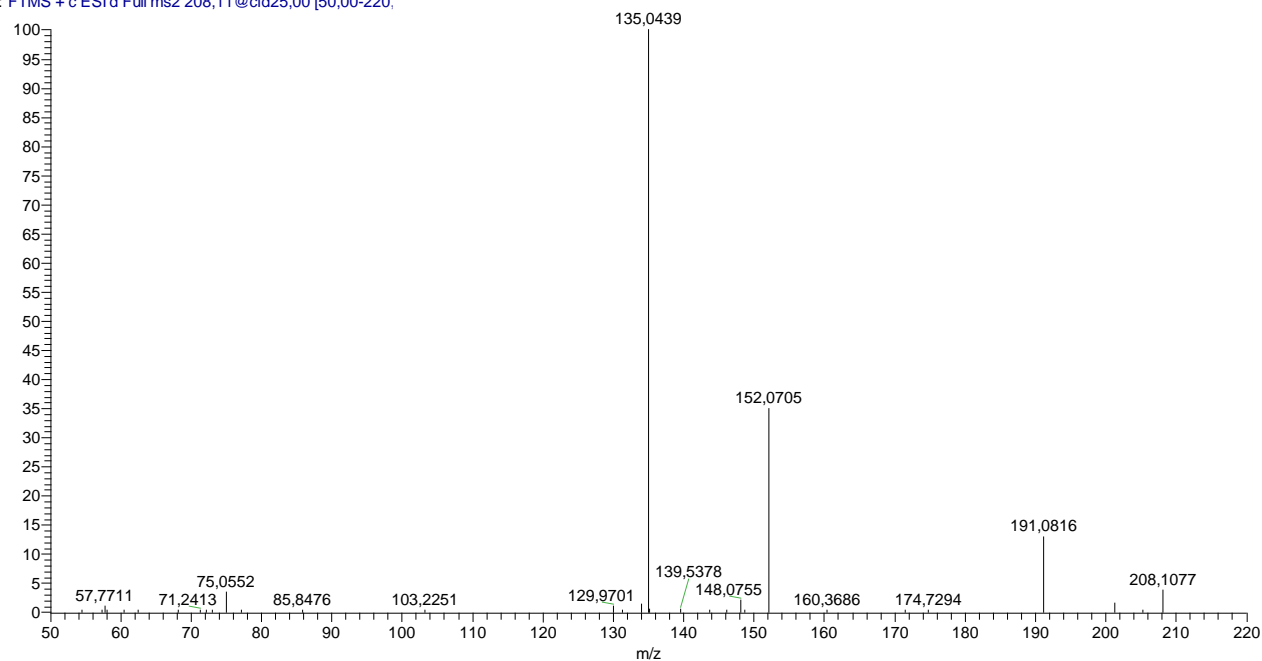

**Figure S1.** LC-HRMS analyses of **1** on an LTQ Orbitrap XL<sup>TM</sup> Hybrid FT Mass Spectrometer system: (A) Extracted ion Chromatogram (XIC) obtained by selecting the ion at  $m/z$  208.1078, (B) relevant HRMS spectrum and (C) relevant HRMS<sup>2</sup> spectrum (Collision Induced Dissociation mode) obtained by using the ion at  $m/z$  208.1 as precursor.

RT: 0,00 - 45,14

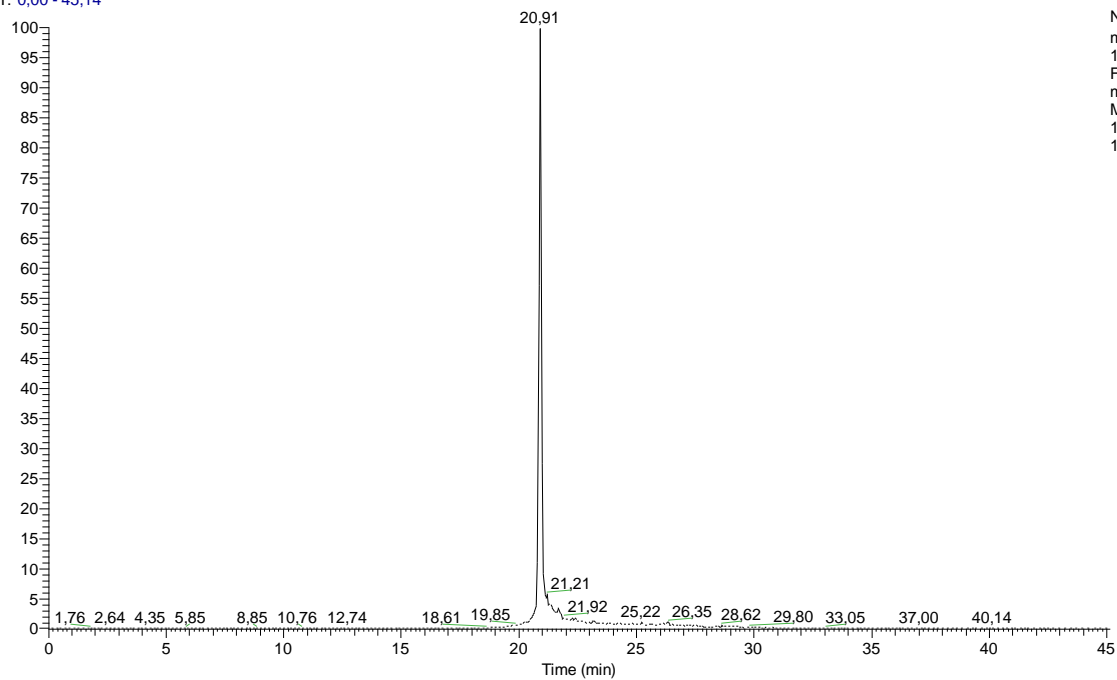

NL: 6,22E7  
m/z= 194,0790-194,0828  
F: FTMS + c ESI Full  
ms [150,00-1100,00]  
MS  
18052023PABMEOH  
10

18052023PABMEOH10 #2185 RT: 20,84 AV: 1 NL: 3,56E7

F: FTMS + c ESI Full ms [150,00-1100,00]

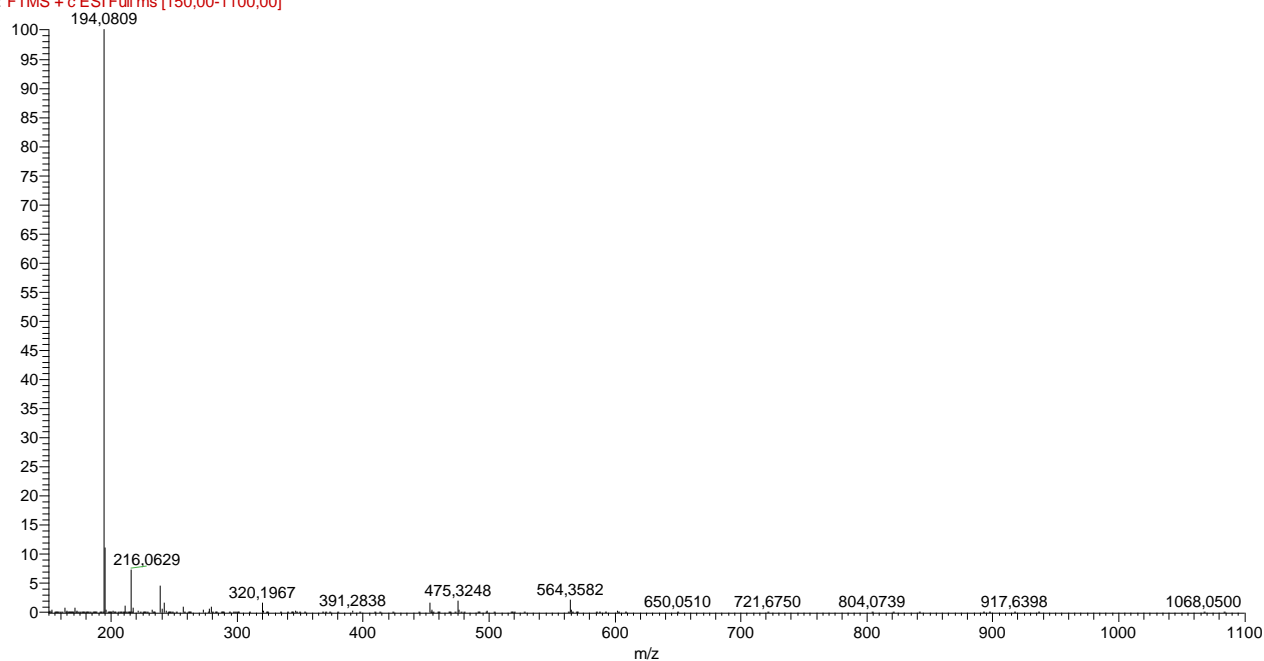

18052023PABMEOH10 #2228 RT: 21,28 AV: 1 NL: 2,38E6  
T: FTMS + c ESI d Full ms2 194,08@cid25,00 [50,00-205]

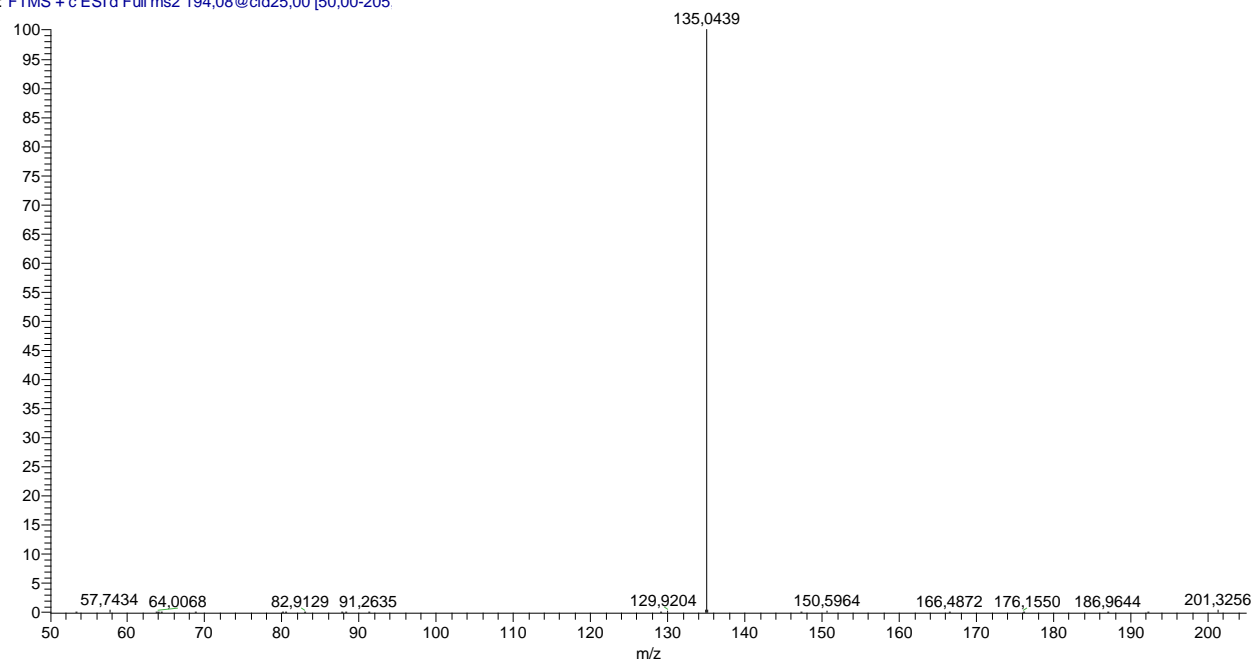

**Figure S2.** LC-HRMS analyses of **2** on an LTQ Orbitrap XL<sup>TM</sup> Hybrid FT Mass Spectrometer system: **(A)** Extracted ion Chromatogram (XIC) obtained by selecting the ion at  $m/z$  194.0809, **(B)** relevant HRMS spectrum and **(C)** relevant HRMS<sup>2</sup> spectrum (Collision Induced Dissociation mode) obtained by using the ion at  $m/z$  194.1 as precursor.

RT: 0,00 - 45,14

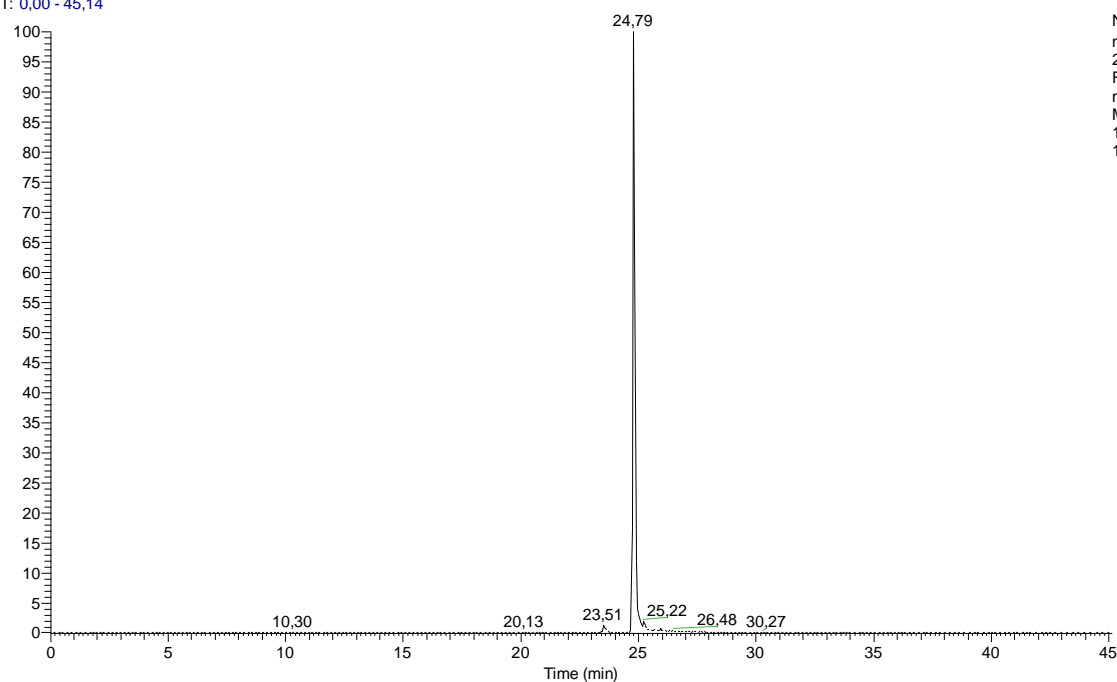

NL: 9,37E6  
 $m/z$ =  
210,0562-210,0604  
F: FTMS + c ESI Full  
ms [150,00-1100,00]  
MS  
18052023PABMEOH  
10

18052023PABMEOH10 #2587 RT: 24,79 AV: 1 NL: 9,37E6

F: FTMS + c ESI Full ms [150,00-1100,00]

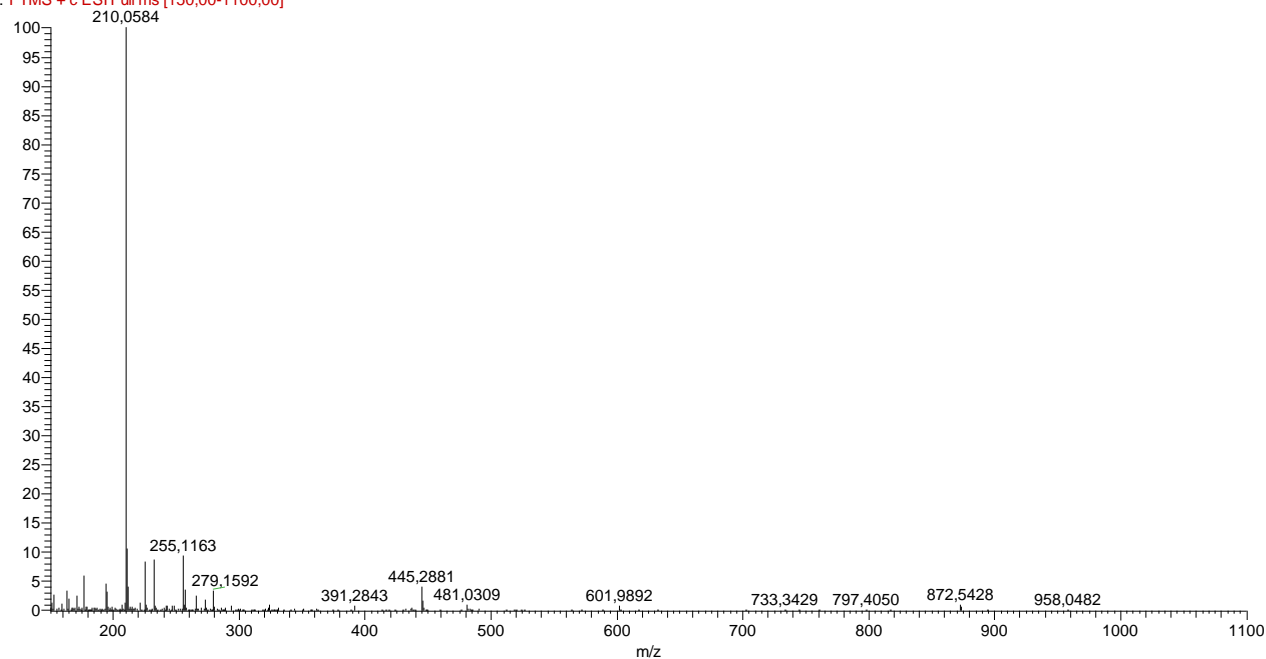

18052023PABMEOH10 #2613 RT: 25,04 AV: 1 NL: 1,96E5

T: FTMS + c ESI d Full ms2 210,06@cid25,00 [50,00-225]

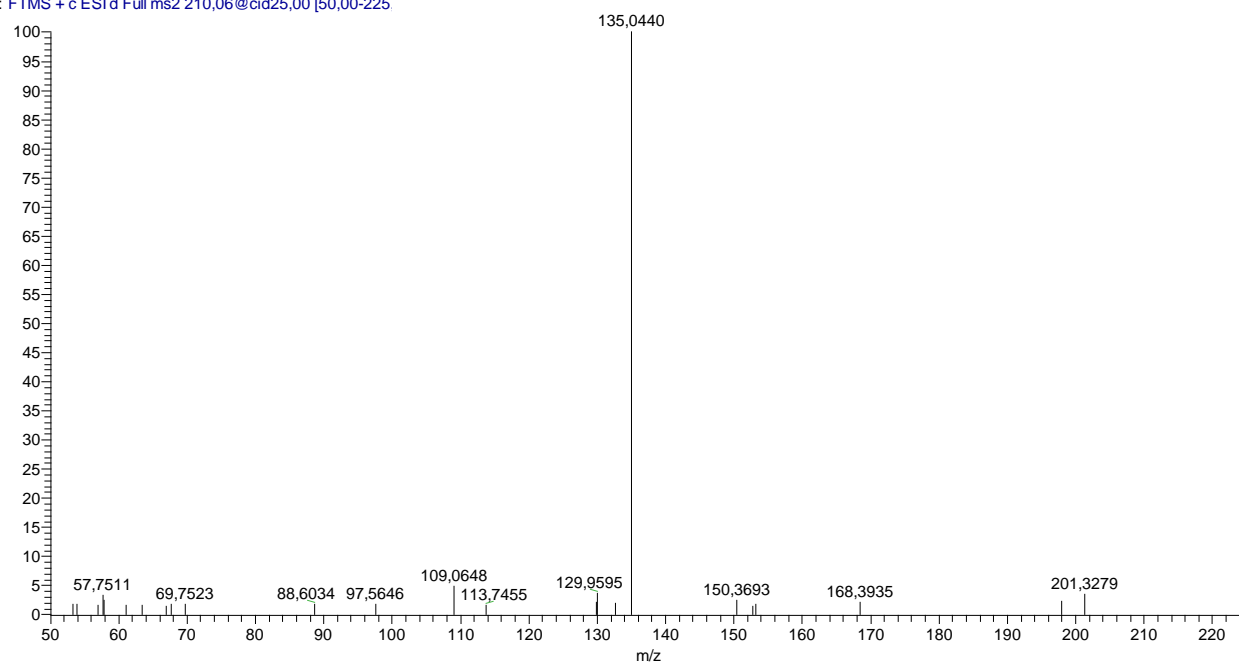

**Figure S3.** LC-HRMS analyses of **3** on an LTQ Orbitrap XL™ Hybrid FT Mass Spectrometer system: (A) Extracted ion Chromatogram (XIC) obtained by selecting the ion at  $m/z$  210.0584, (B) relevant HRMS spectrum and (C) relevant HRMS<sup>2</sup> spectrum (Collision Induced Dissociation mode) obtained by using the ion at  $m/z$  210.1 as precursor.

RT: 0,00 - 45,14

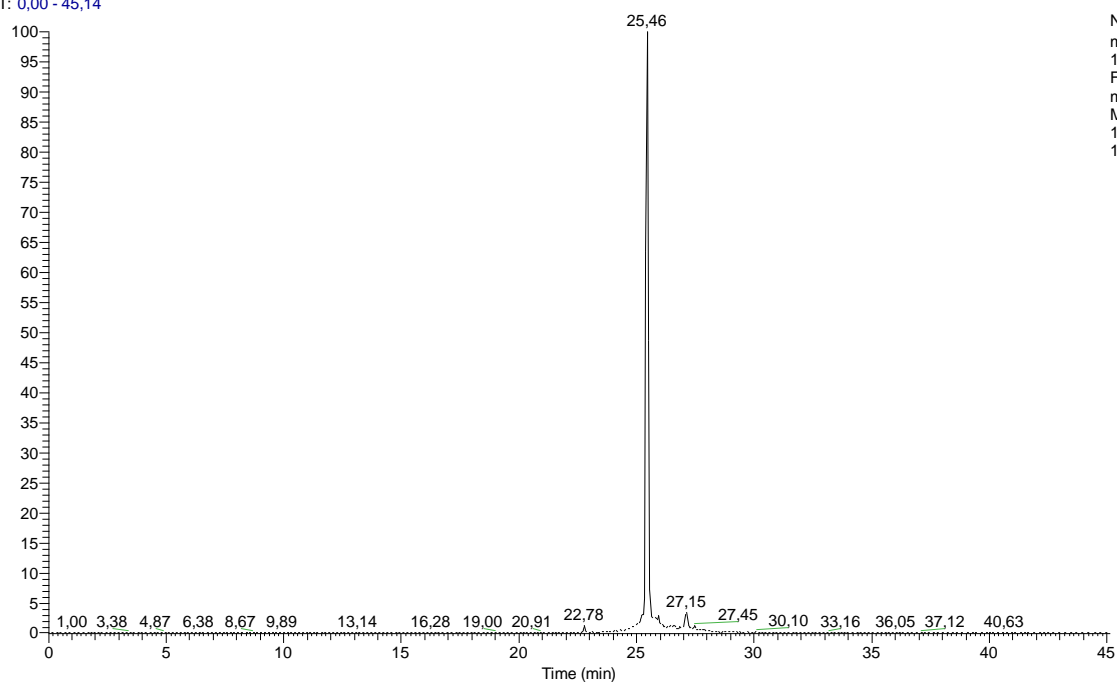

NL: 3,48E7  
m/z=  
195,0640-195,0660  
F: FTMS + c ESI Full  
ms [150,00-1100,00]  
MS  
18052023PABMEOH  
10

18052023PABMEOH10 #2659 RT: 25,46 AV: 1 NL: 3,48E7  
F: FTMS + c ESI Full ms [150,00-1100,00]

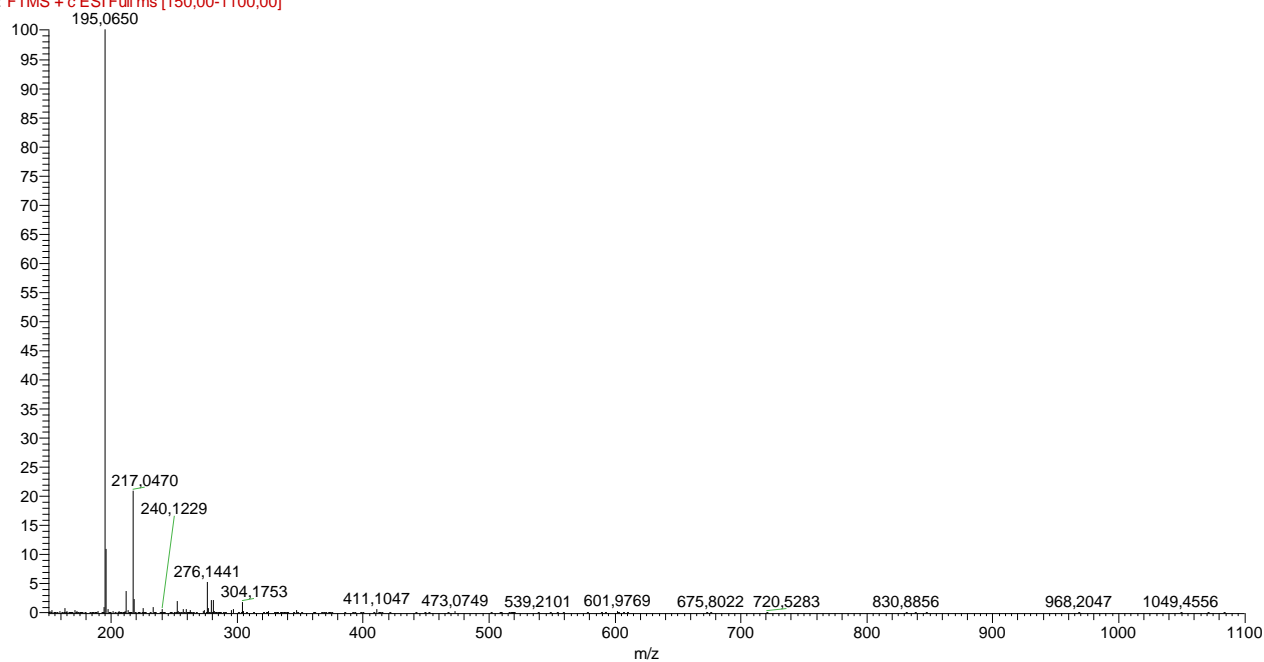



18052023PABMEOH10 #2672 RT: 25,59 AV: 1 NL: 1,36E6  
T: FTMS + c ESI d Full ms2 195,07@cid25,00 [50,00-210]

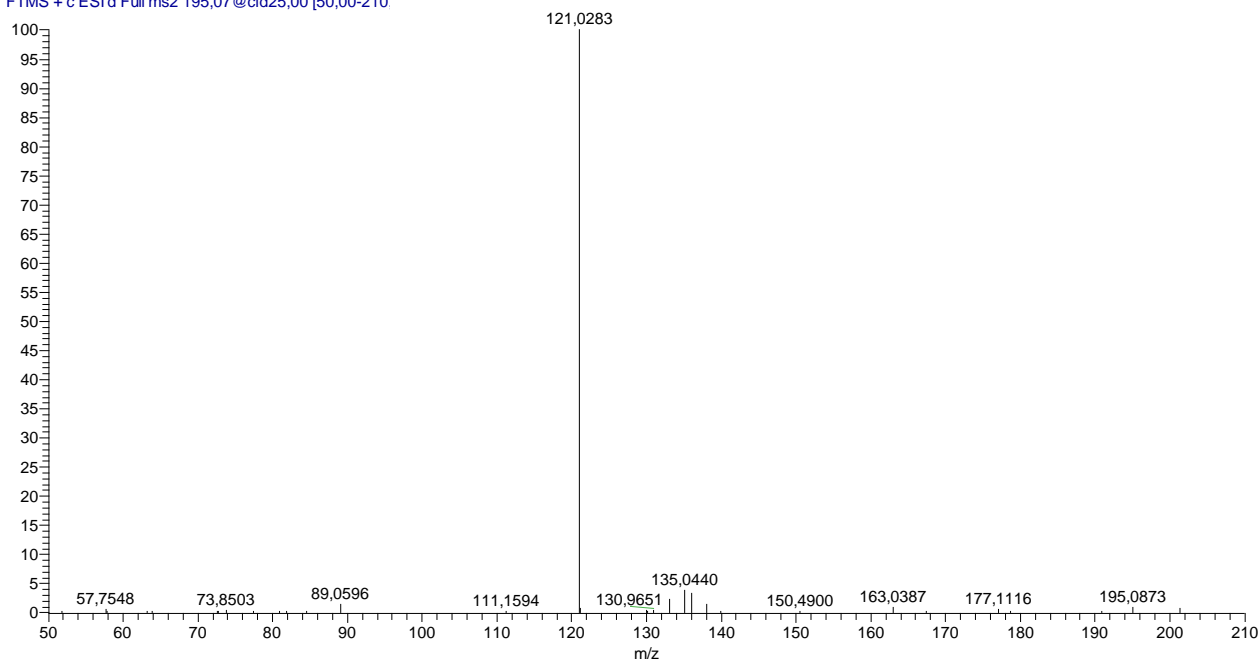

**Figure S4.** LC-HRMS analyses of **4** on an LTQ Orbitrap XL<sup>TM</sup> Hybrid FT Mass Spectrometer system: **(A)** Extracted ion Chromatogram (XIC) obtained by selecting the ion at  $m/z$  195.0650, **(B)** relevant HRMS spectrum and **(C)** relevant HRMS<sup>2</sup> spectrum (Collision Induced Dissociation mode) obtained by using the ion at  $m/z$  195.1 as precursor.

RT: 25,36 - 38,28

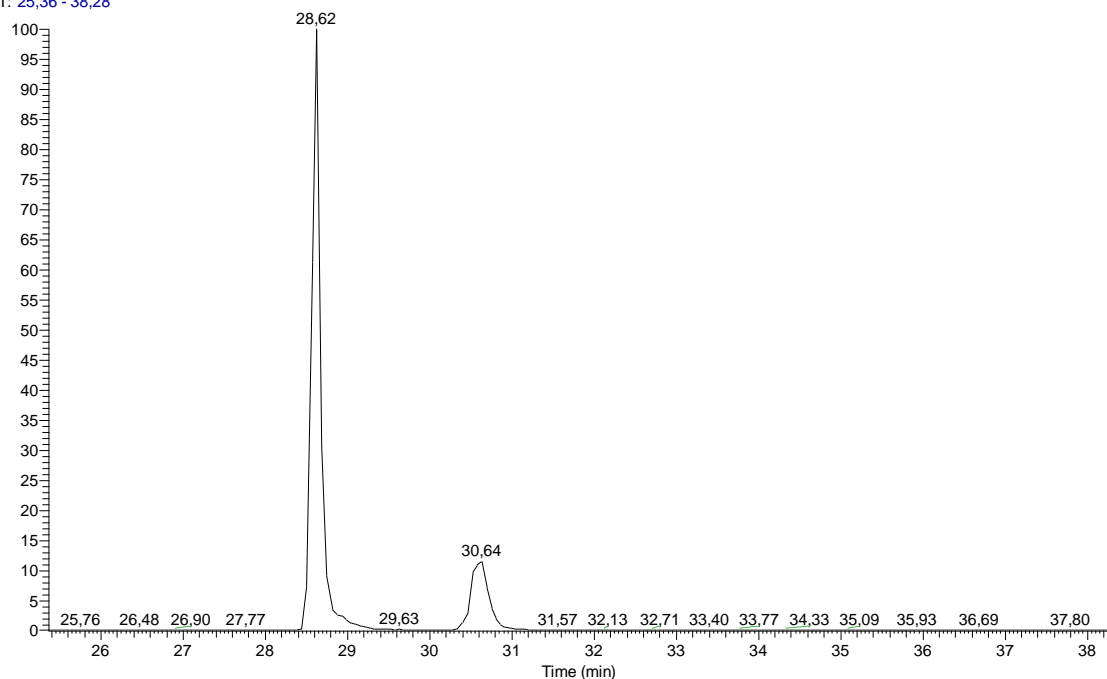

NL: 3,63E8  
 $m/z$ =  
266,1119-266,1145  
F: FTMS + c ESI Full  
ms [150,00-1100,00]  
MS  
18052023PABMEOH  
10

18052023PABMEOH10 #2965 RT: 28,57 AV: 1 NL: 2,23E8

F: FTMS + c ESI Full ms [150,00-1100,00]

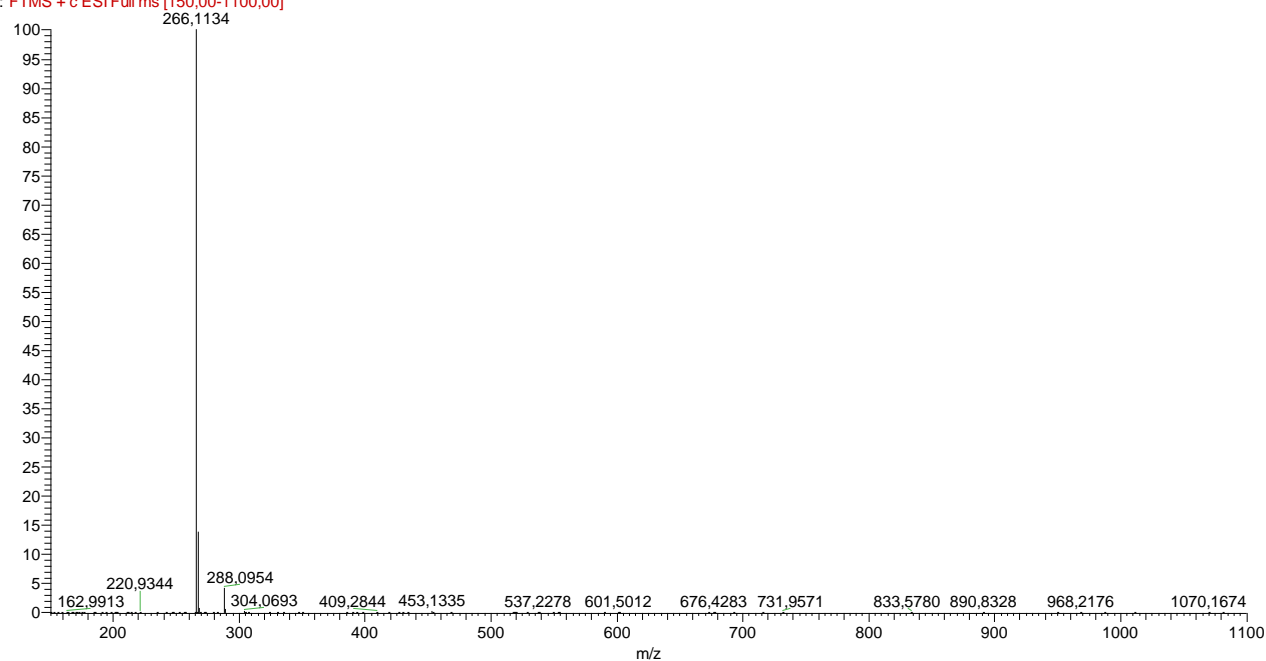

18052023PABMEOH10 #2996 RT: 28,90 AV: 1 NL: 4,08E6

T: FTMS + c ESI d Full ms2 266,11 @cid25,00 [60,00-280,

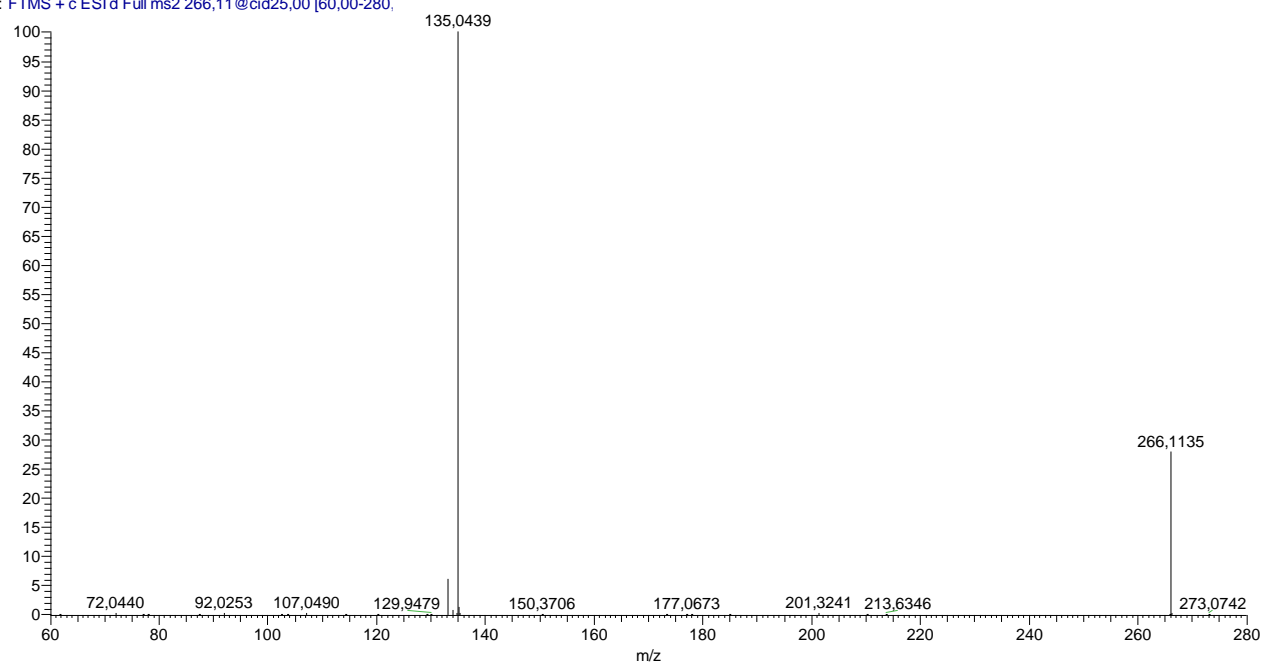

18052023PABMEOH10 #3205 RT: 30.94 AV: 1 NL: 7.36E5  
T: FTMS + c ESI d Full ms2 266,11 @cid25,00 [60,00-280]

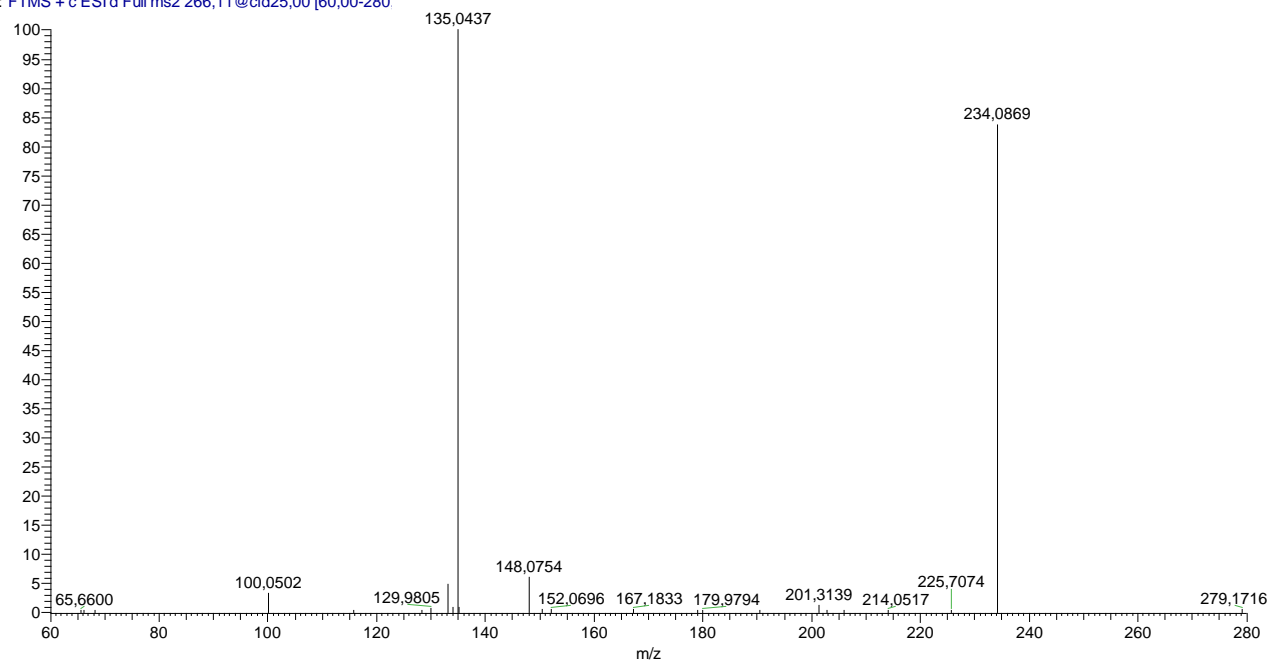

**Figure S5.** LC-HRMS analyses of **5** on an LTQ Orbitrap XL<sup>TM</sup> Hybrid FT Mass Spectrometer system: **(A)** Extracted ion Chromatogram (XIC) obtained by selecting the ion at  $m/z$  266.1134, **(B)** relevant HRMS spectrum and **(C)** relevant HRMS<sup>2</sup> spectrum (Collision Induced Dissociation mode) obtained by using the ion at  $m/z$  266.1 as precursor.

RT: 0,00 - 45,14

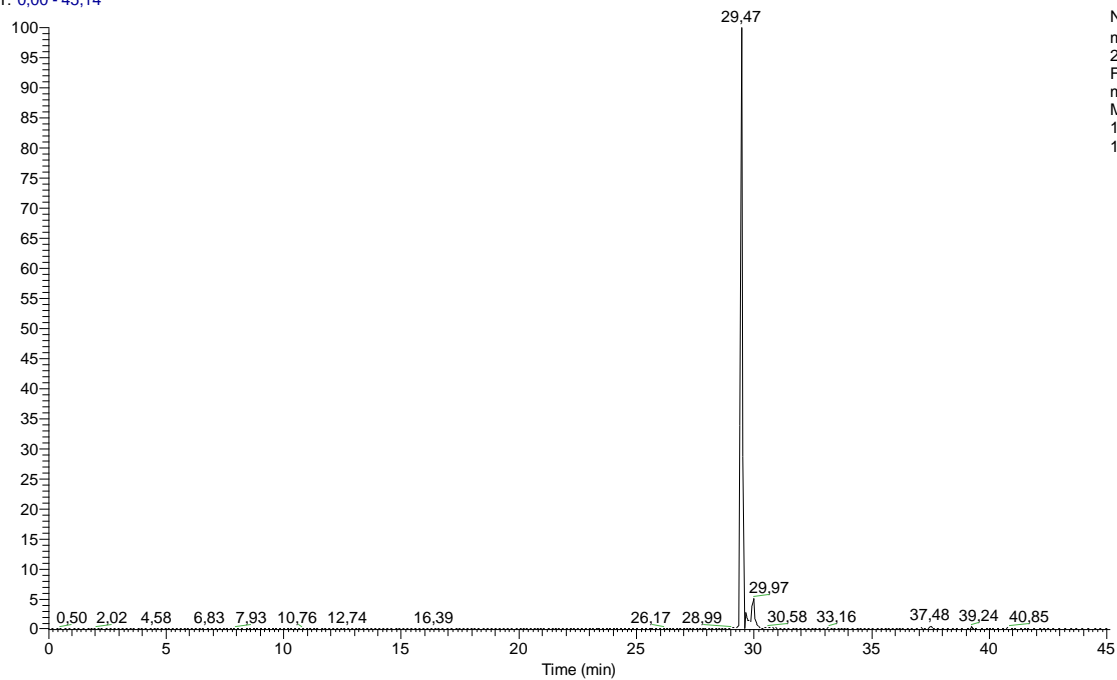

NL: 1,65E7  
m/z= 236,0475-236,0499  
F: FTMS + c ESI Full  
ms [150,00-1100,00]  
MS  
18052023PABMEOH  
10

18052023PABMEOH10 #3055 RT: 29.47 AV: 1 NL: 1,65E7  
F: FTMS + c ESI Full ms [150,00-1100,00]

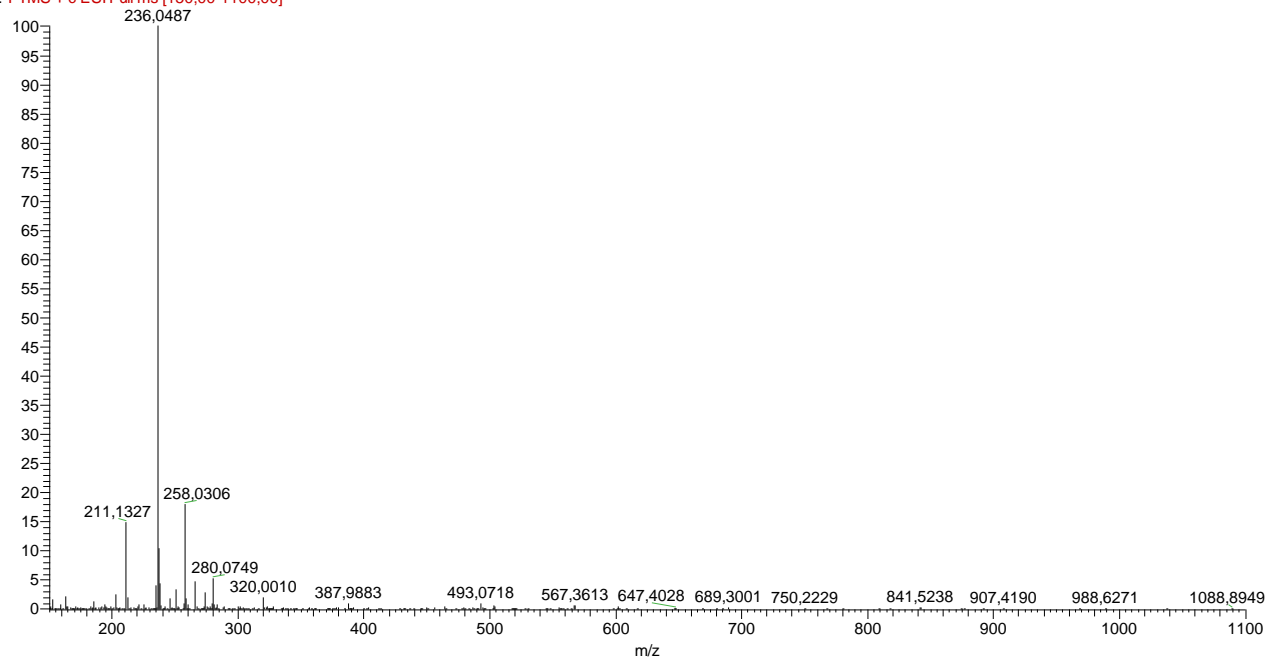

18052023PABMEOH10 #3050 RT: 29.43 AV: 1 NL: 3,04E6  
T: FTMS + c ESI d Full ms2 236,05@cid25,00 [50,00-250,

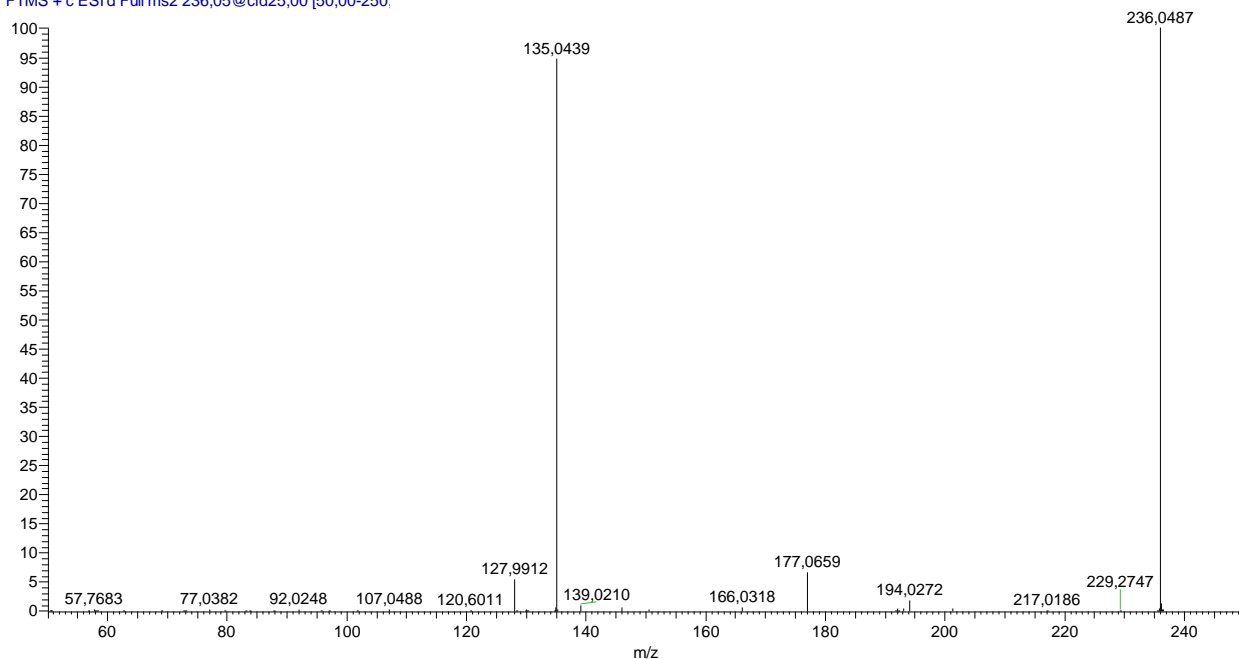

18052023PABMEOH10 #3092 RT: 29.82 AV: 1 NL: 1,43E5  
T: FTMS + c ESI d Full ms2 236,05@cid25,00 [50,00-250,

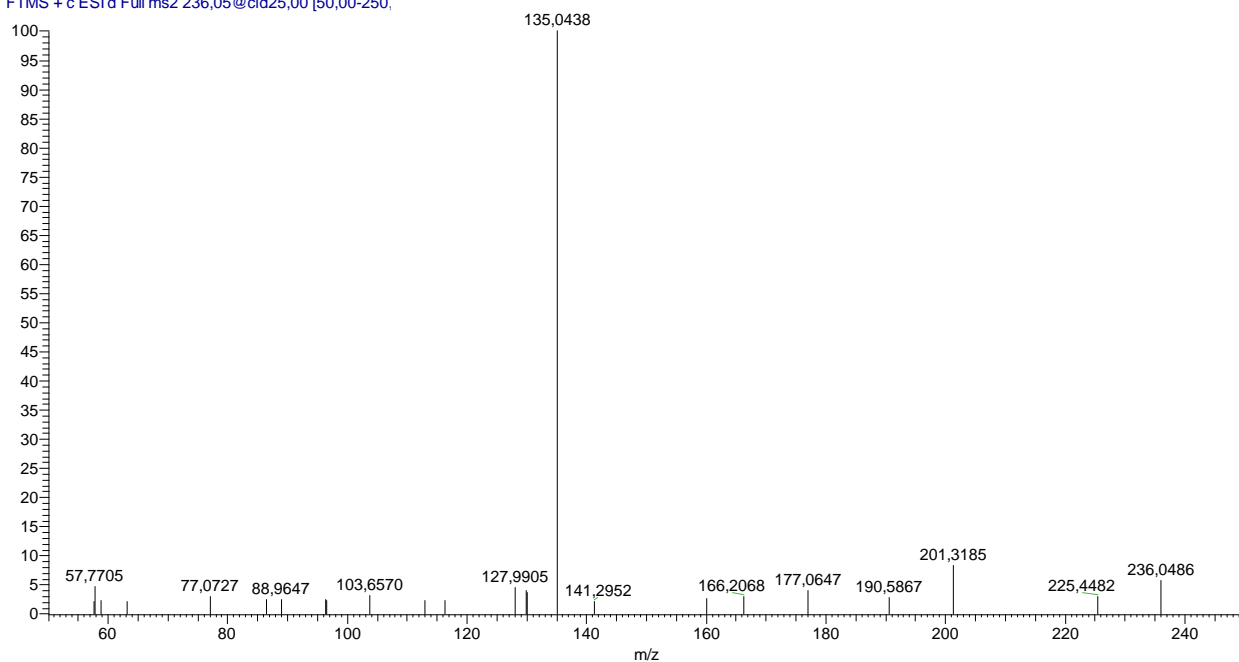

**Figure S6.** LC-HRMS analyses of **6** on an LTQ Orbitrap XL™ Hybrid FT Mass Spectrometer system: **(A)** Extracted ion Chromatogram (XIC) obtained by selecting the ion at  $m/z$  236.0487, **(B)** relevant HRMS spectrum and **(C)** relevant HRMS<sup>2</sup> spectrum (Collision Induced Dissociation mode) obtained by using the ion at  $m/z$  236.0 as precursor.

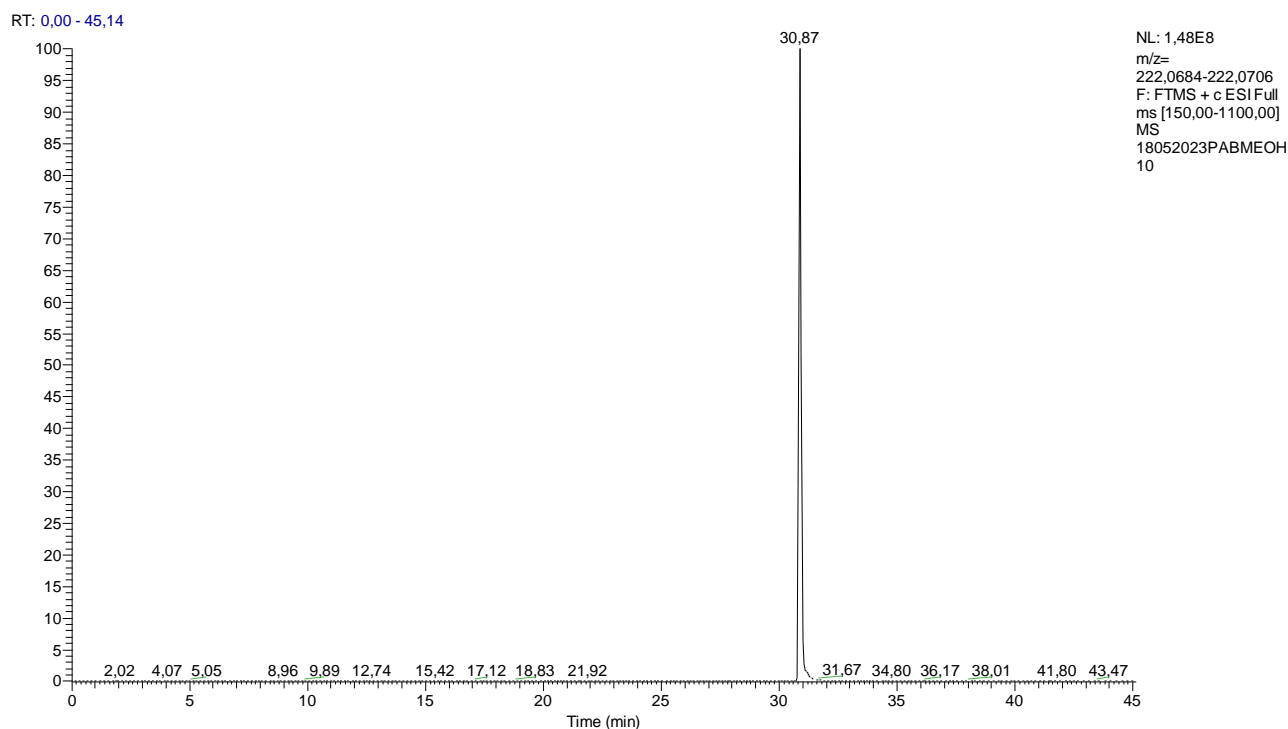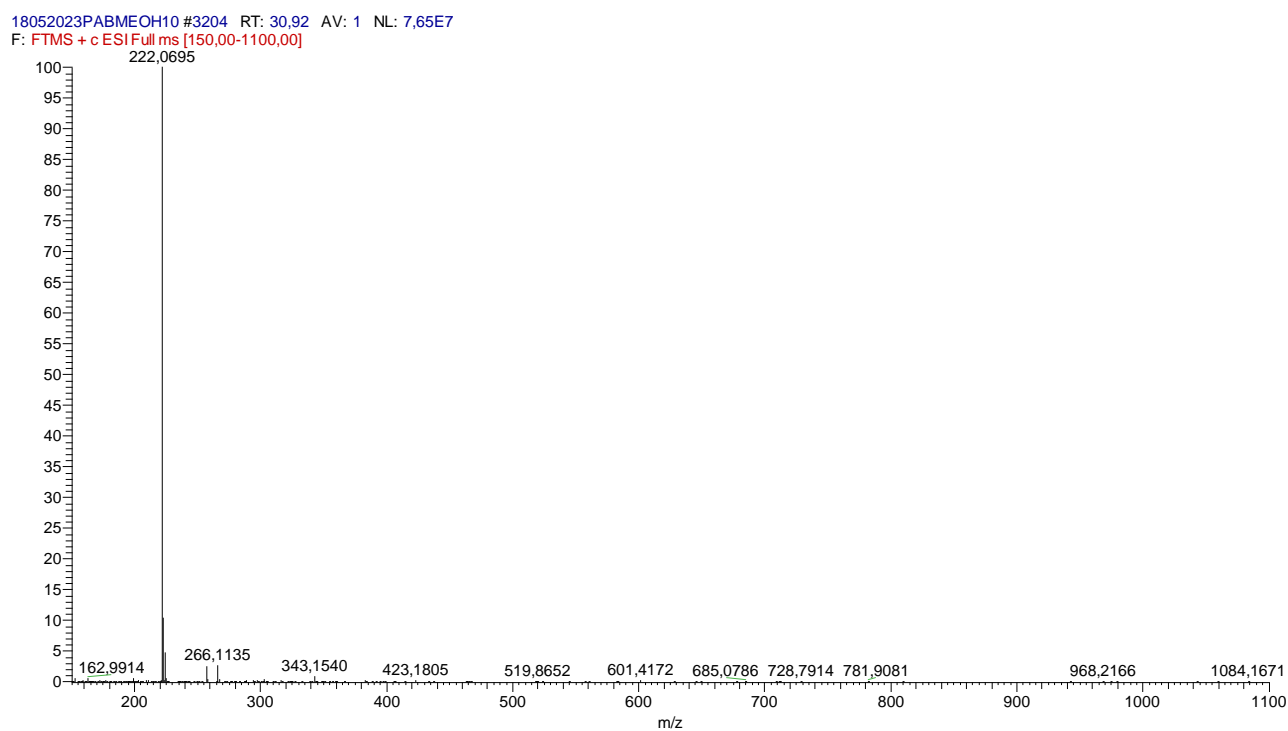

**Figure S7.** LC-HRMS analyses of **7** on an LTQ Orbitrap XL™ Hybrid FT Mass Spectrometer system: **(A)** Extracted ion Chromatogram (XIC) obtained by selecting the ion at  $m/z$  222.0695, **(B)** relevant HRMS spectrum.

RT: 0,00 - 45,14

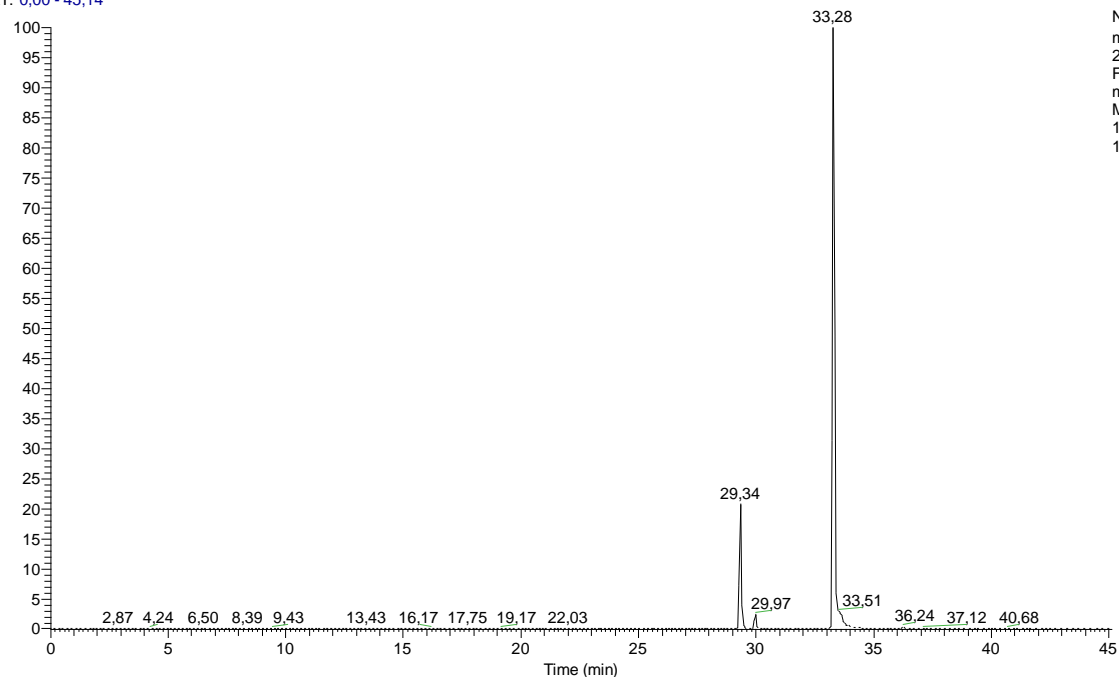

NL: 1,43E8  
m/z= 280,0736-280,0764  
F: FTMS + c ESI Full  
ms [150,00-1100,00]  
MS  
18052023PABMEOH  
10

18052023PABMEOH10 #3456 RT: 33,34 AV: 1 NL: 1,54E8

F: FTMS + c ESI Full ms [150,00-1100,00]

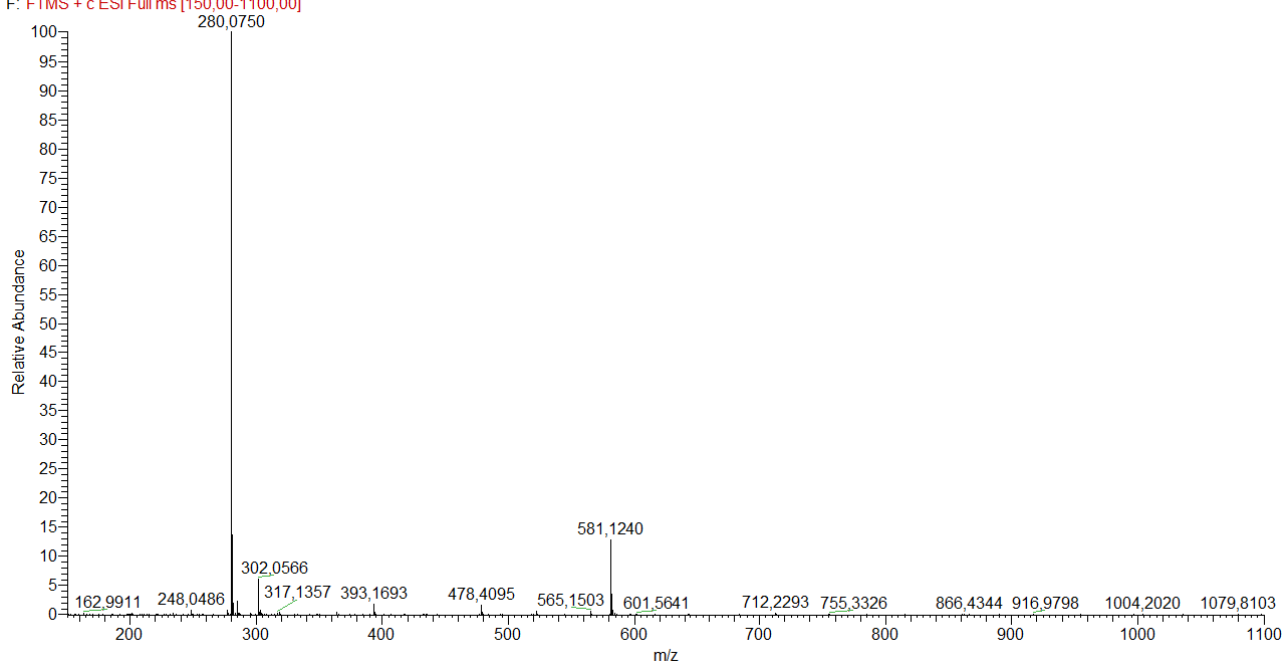

18052023PABMEOH10 #3481 RT: 33.60 AV: 1 NL: 2.78E6  
T: FTMS + c ESI d Full ms2 280,13@cid25,00 [65,00-295,00]

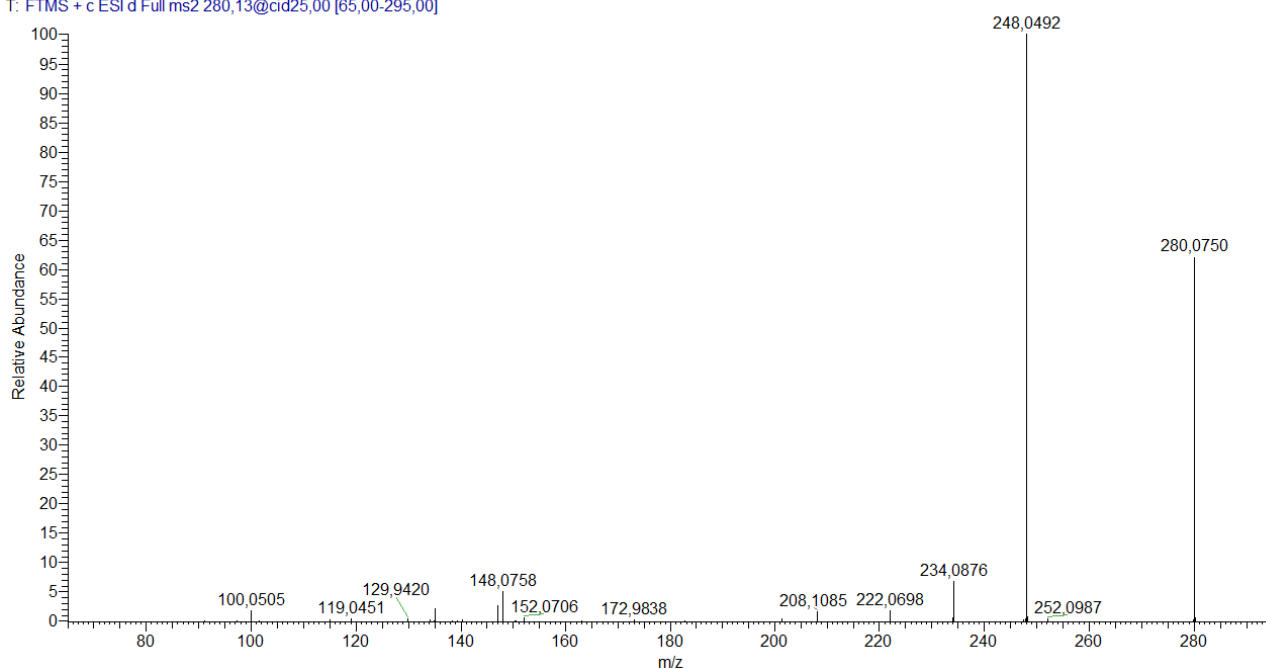

**Figure S8.** LC-HRMS analyses of **8** on an LTQ Orbitrap XL<sup>TM</sup> Hybrid FT Mass Spectrometer system: **(A)** Extracted ion Chromatogram (XIC) obtained by selecting the ion at  $m/z$  280.0750, **(B)** relevant HRMS spectrum and **(C)** relevant HRMS<sup>2</sup> spectrum (Collision Induced Dissociation mode) obtained by using the ion at  $m/z$  280.1 as precursor.



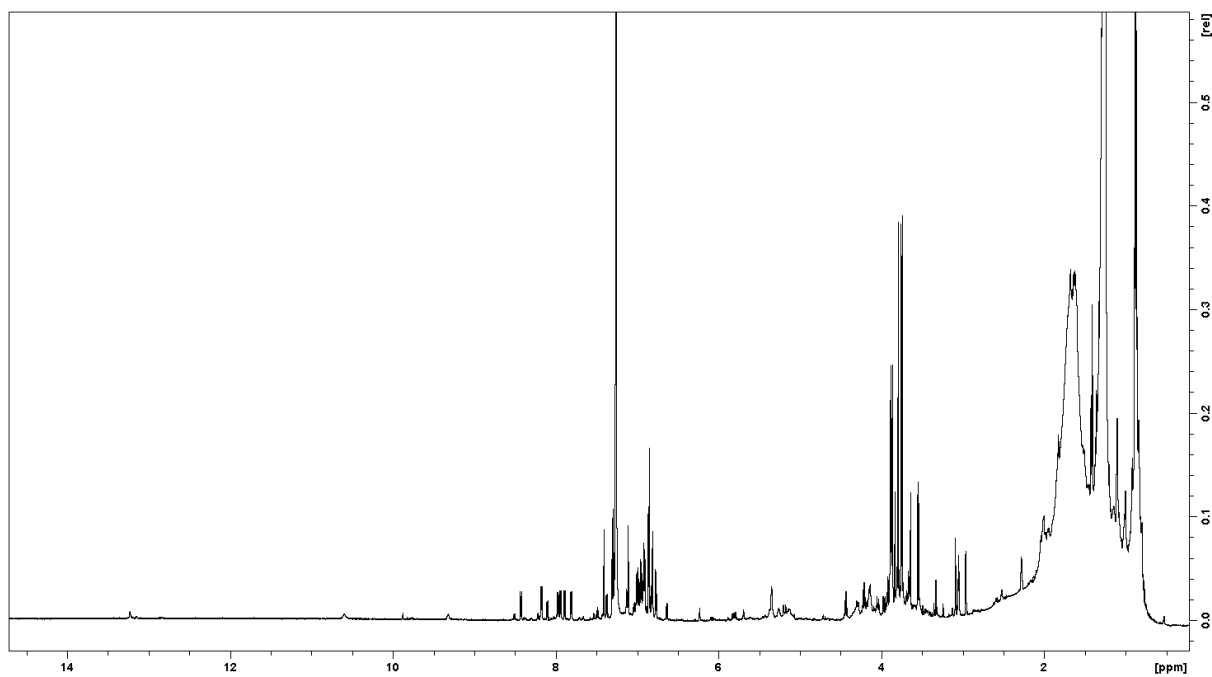

**Figure S9.**  $^1\text{H}$  NMR spectrum (700 MHz) in  $\text{CDCl}_3$  of PAB2.

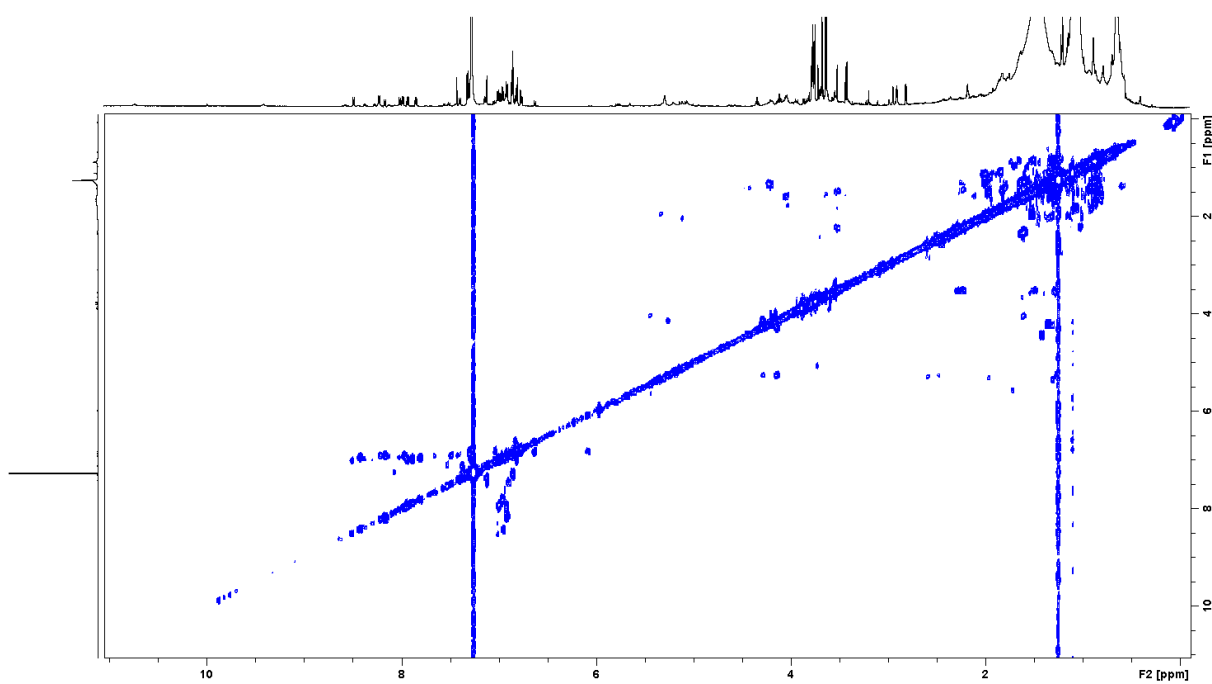

**Figure S10.** COSY spectrum in  $\text{CDCl}_3$  of PAB2.

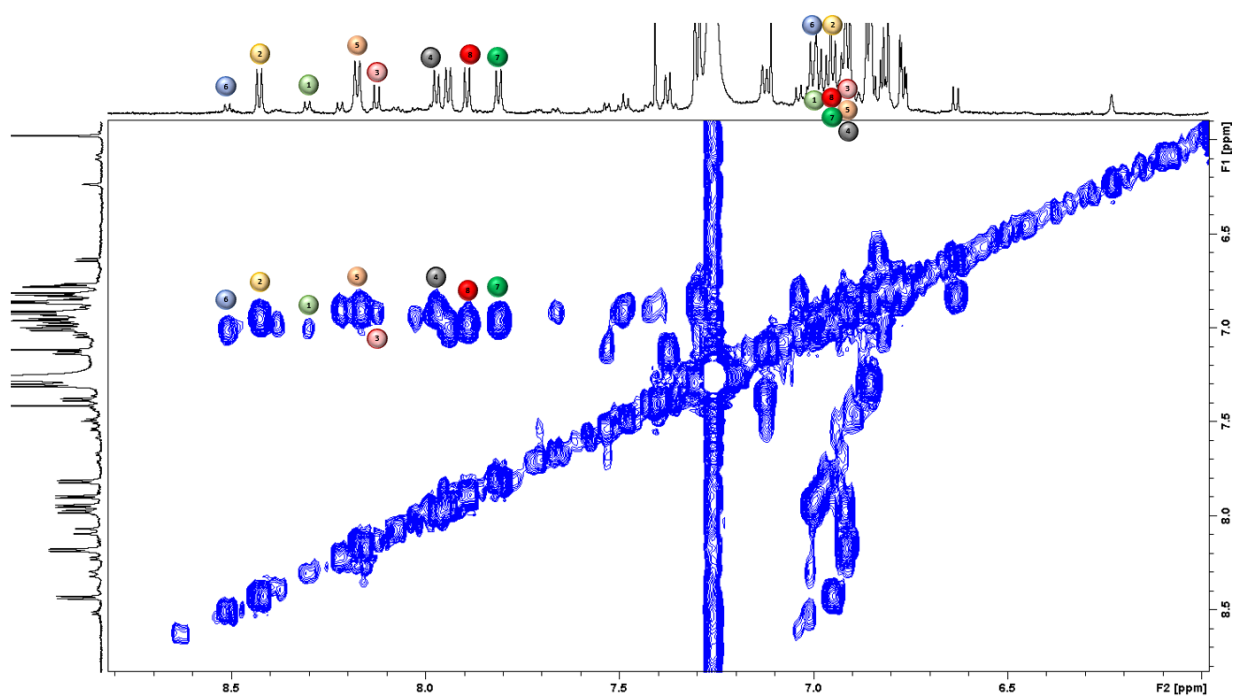

**Figure S11.** Downfield region enlargement of COSY spectrum in CDCl<sub>3</sub> of PAB2.

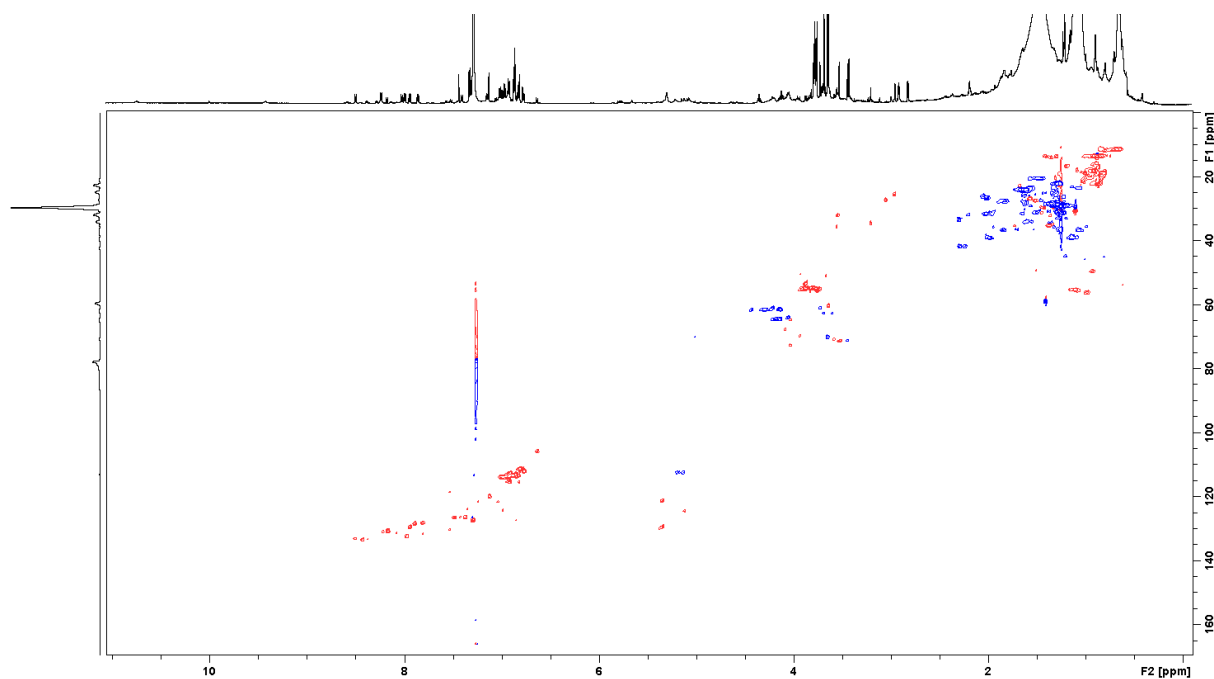

**Figure S12.** HSQC spectrum in CDCl<sub>3</sub> of PAB2.

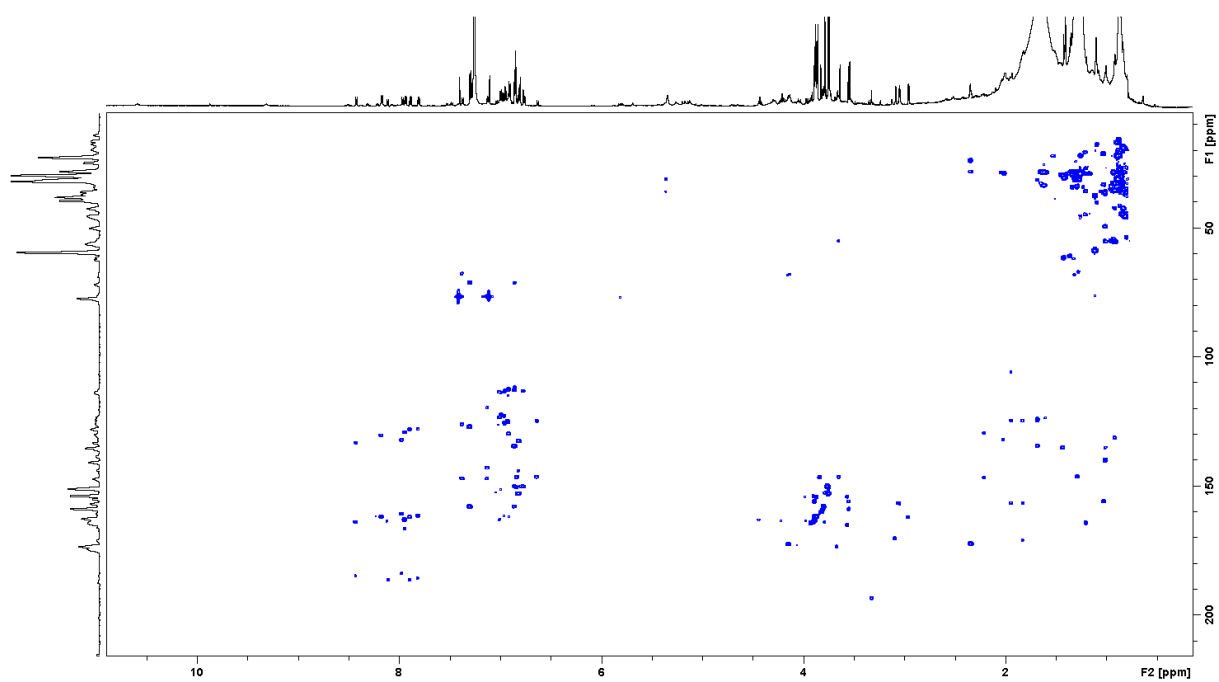

**Figure S13.** HMBC spectrum in  $\text{CDCl}_3$  of PAB2.

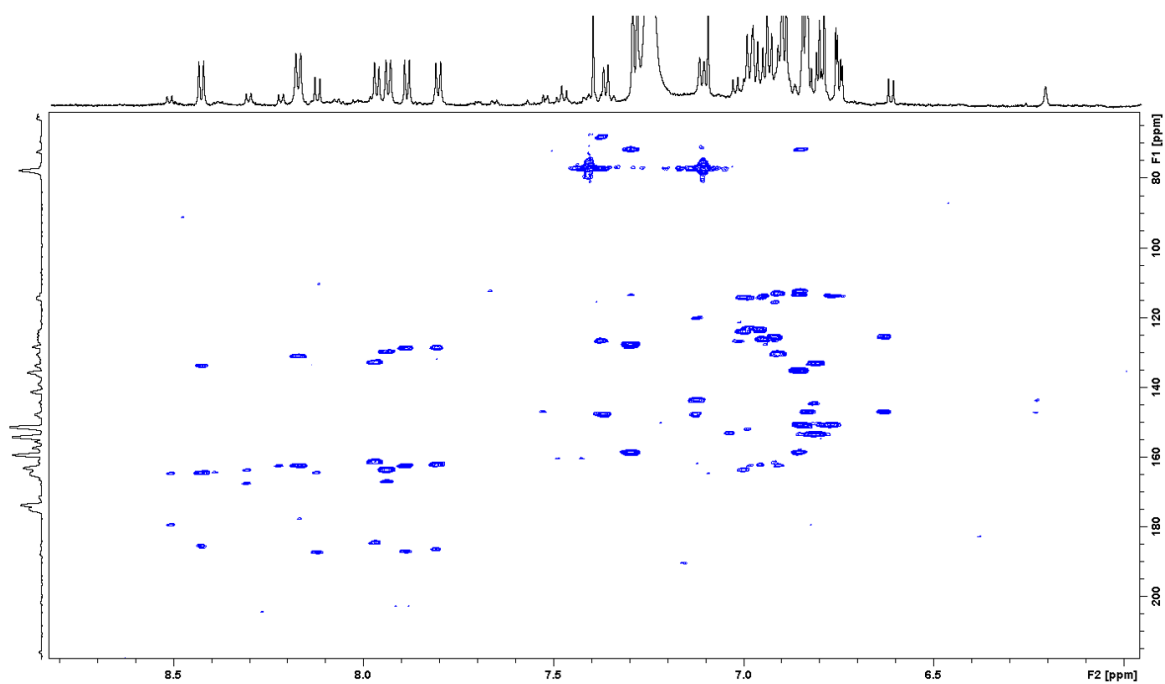

**Figure S14.** Downfield region enlargement of HMBC spectrum in  $\text{CDCl}_3$  of PAB2.
